# Supplementary material
Source: MDPI journal article supplement (https://www.mdpi.com/2037-0164/14/1/25)
Supplement: s1 [file s1]

# Analysis of Genetic Diversity and Population Structure in Yam (*Dioscorea* species) Germplasm Using Start Codon Targeted (SCoT) Molecular Markers

Anne Owiti<sup>1,2</sup>, Joel L. Bargul<sup>2,3</sup> and George O. Obiero<sup>1</sup>, Evans N. Nyaboga<sup>1\*</sup>

<sup>1</sup>Department of Biochemistry, University of Nairobi, Nairobi, Kenya

<sup>2</sup>Department of Biochemistry, Jomo Kenyatta University of Agriculture and Technology (JKUAT), Nairobi, Kenya

<sup>3</sup>International Centre of Insect Physiology and Ecology (ICIPE), Nairobi, Kenya

\*Author to whom correspondence should be addressed.

**Citation:** To be added by editorial staff during production.

Academic Editor: Firstname  
Lastname

Received: date

Revised: date

Accepted: date

Published: date

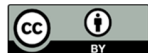

**Copyright:** © 2023 by the authors.

Submitted for possible open access publication under the terms and conditions of the Creative Commons Attribution (CC BY) license (<http://creativecommons.org/licenses/by/4.0/>).

**Supplementary Table S1:** List of SCoT primer sequences used for PCR amplification and genetic diversity of 20 yam accessions

| No | Name   | Sequences          | %G/C | Annealing temperature (°C) | Size of amplified products ranges (bp) |
|----|--------|--------------------|------|----------------------------|----------------------------------------|
| 1  | SCoT2  | CAACAATGGCTACCACCC | 56   | 50                         | 200 - 2500                             |
| 2  | SCoT3  | CAACAATGGCTACCACCG | 56   | 53                         | 200 - 2500                             |
| 3  | SCoT6  | CAACAATGGCTACCACGC | 56   | 50                         | 200 - 3000                             |
| 4  | SCoT7  | CAACAATGGCTACCACGG | 56   | 48                         | 350 - 3000                             |
| 5  | SCoT9  | CAACAATGGCTACCAGCA | 50   | 56                         | 200 - 3000                             |
| 6  | SCoT10 | CAACAATGGCTACCAGCC | 56   | 56                         | 500 - 3000                             |

|    |        |                    |    |    |             |
|----|--------|--------------------|----|----|-------------|
| 7  | SCoT11 | AAGCAATGGCTACCACCA | 50 | 51 | 300 - 3000  |
| 8  | SCoT12 | ACGACATGGCGACCAACG | 61 | 52 | 350 - 3000  |
| 9  | SCoT14 | ACGACATGGCGACCACGC | 56 | 60 | 350 - 1300  |
| 10 | SCoT16 | ACCATGGCTACCACCGAC | 56 | 52 | 100 - 3000  |
| 11 | SCoT17 | ACCATGGCTACCACCGAG | 67 | 54 | 350 - 3000  |
| 12 | SCoT19 | ACCATGGCTACCACCGGC | 67 | 56 | 200 - 3000  |
| 13 | SCoT20 | ACCATGGCTACCACCGCG | 67 | 60 | 200 - 2500  |
| 14 | SCoT21 | ACGACATGGCGACCCACA | 61 | 60 | 200 - 2000  |
| 15 | SCoT23 | CACCATGGCTACCACCAG | 61 | 52 | 1300 - 3000 |
| 16 | SCoT25 | ACCATGGCTACCACCGGG | 67 | 56 | 200 - 3000  |
| 17 | SCoT26 | ACCATGGCTACCACCGTC | 61 | 52 | 200 - 4000  |
| 18 | SCoT27 | ACCATGGCTACCACCGTG | 61 | 56 | 400 - 1500  |
| 19 | SCoT29 | CCATGGCTACCACCGGCC | 72 | 58 | 250 - 3000  |
| 20 | SCoT30 | CCATGGCTACCACCGGCG | 72 | 60 | 200 - 2000  |
| 21 | SCoT32 | CCATGGCTACCACCGCAC | 67 | 60 | 100 - 3000  |
| 22 | SCoT33 | CCATGGCTACCACCGCAG | 67 | 58 | 200 - 5000  |
| 23 | SCoT34 | ACCATGGCTACCACCGCA | 61 | 60 | 200 - 3000  |
| 24 | SCoT35 | CATGGCTACCACCGGCCC | 72 | 58 | 200 - 3000  |
| 25 | SCoT36 | GCAACAATGGCTACCACC | 56 | 51 | 200 - 4000  |

**Supplementary Table S2:** Jaccard's similarity coefficient generated from the binary data.

|     | A    | B    | C    | D    | E    | F    | G    | H    | E7   | E10  | E0   | E1   | E2   | E3   | E4   | E5   | E6   | E9   | E8   | E11 |
|-----|------|------|------|------|------|------|------|------|------|------|------|------|------|------|------|------|------|------|------|-----|
| A   | 1    |      |      |      |      |      |      |      |      |      |      |      |      |      |      |      |      |      |      |     |
| B   | 0.36 | 1    |      |      |      |      |      |      |      |      |      |      |      |      |      |      |      |      |      |     |
| C   | 0.57 | 0.29 | 1    |      |      |      |      |      |      |      |      |      |      |      |      |      |      |      |      |     |
| D   | 0.51 | 0.36 | 0.45 | 1    |      |      |      |      |      |      |      |      |      |      |      |      |      |      |      |     |
| E   | 0.61 | 0.31 | 0.59 | 0.59 | 1    |      |      |      |      |      |      |      |      |      |      |      |      |      |      |     |
| F   | 0.53 | 0.33 | 0.57 | 0.48 | 0.57 | 1    |      |      |      |      |      |      |      |      |      |      |      |      |      |     |
| G   | 0.65 | 0.33 | 0.60 | 0.57 | 0.68 | 0.62 | 1    |      |      |      |      |      |      |      |      |      |      |      |      |     |
| H   | 0.34 | 0.38 | 0.32 | 0.36 | 0.36 | 0.32 | 0.37 | 1    |      |      |      |      |      |      |      |      |      |      |      |     |
| E7  | 0.44 | 0.22 | 0.43 | 0.34 | 0.47 | 0.38 | 0.43 | 0.22 | 1    |      |      |      |      |      |      |      |      |      |      |     |
| E10 | 0.46 | 0.24 | 0.50 | 0.41 | 0.49 | 0.45 | 0.46 | 0.23 | 0.65 | 1    |      |      |      |      |      |      |      |      |      |     |
| E0  | 0.44 | 0.24 | 0.44 | 0.37 | 0.45 | 0.37 | 0.41 | 0.24 | 0.66 | 0.66 | 1    |      |      |      |      |      |      |      |      |     |
| E1  | 0.53 | 0.24 | 0.48 | 0.38 | 0.50 | 0.44 | 0.48 | 0.27 | 0.71 | 0.70 | 0.74 | 1    |      |      |      |      |      |      |      |     |
| E2  | 0.50 | 0.24 | 0.50 | 0.37 | 0.50 | 0.43 | 0.49 | 0.26 | 0.72 | 0.70 | 0.72 | 0.83 | 1    |      |      |      |      |      |      |     |
| E3  | 0.51 | 0.23 | 0.50 | 0.36 | 0.50 | 0.43 | 0.47 | 0.26 | 0.73 | 0.71 | 0.72 | 0.79 | 0.87 | 1    |      |      |      |      |      |     |
| E4  | 0.48 | 0.21 | 0.49 | 0.36 | 0.49 | 0.43 | 0.46 | 0.24 | 0.76 | 0.70 | 0.68 | 0.77 | 0.82 | 0.82 | 1    |      |      |      |      |     |
| E5  | 0.49 | 0.22 | 0.49 | 0.36 | 0.48 | 0.40 | 0.45 | 0.22 | 0.76 | 0.73 | 0.72 | 0.80 | 0.84 | 0.77 | 0.85 | 1    |      |      |      |     |
| E6  | 0.50 | 0.21 | 0.48 | 0.37 | 0.49 | 0.40 | 0.45 | 0.22 | 0.71 | 0.71 | 0.69 | 0.76 | 0.81 | 0.78 | 0.79 | 0.84 | 1    |      |      |     |
| E9  | 0.49 | 0.23 | 0.48 | 0.37 | 0.49 | 0.42 | 0.46 | 0.24 | 0.74 | 0.73 | 0.68 | 0.77 | 0.83 | 0.83 | 0.80 | 0.83 | 0.81 | 1    |      |     |
| E8  | 0.48 | 0.23 | 0.48 | 0.38 | 0.50 | 0.44 | 0.48 | 0.23 | 0.74 | 0.69 | 0.67 | 0.74 | 0.78 | 0.76 | 0.80 | 0.82 | 0.87 | 0.81 | 1    |     |
| E11 | 0.51 | 0.23 | 0.49 | 0.36 | 0.50 | 0.43 | 0.50 | 0.23 | 0.73 | 0.69 | 0.64 | 0.70 | 0.78 | 0.75 | 0.70 | 0.74 | 0.77 | 0.76 | 0.77 | 1   |

## Supplementary Figures

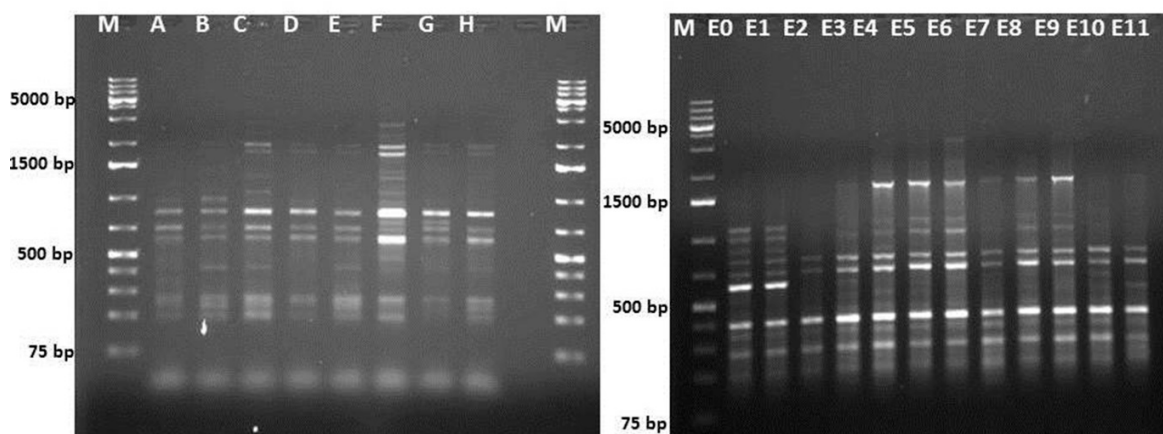

**Supplementary Figure S1:** Representative agarose gel electrophoresis showing amplification profile: (A) for marker SCoT33 and (B) SCoT35 in yam accessions, where M: 1 kb plus ladder, Lane A – H and E0 – E11 denoted different accessions.
